# Supplementary material
Source: publisher figshare collection journal article supplement (https://acs.figshare.com/ndownloader/files/4757011)
Supplement: Supplementary file 1 [file 4757011]

# Supporting Information

## Triterpene Saponins from *Gynostemma* *cardiospermum*

Feng Yin,<sup>†,‡</sup> Yinan Zhang,<sup>†</sup> Zhengyi Yang,<sup>†</sup> Qiuqun Cheng<sup>†</sup> and Lihong Hu,<sup>\*,†,§</sup>

**Figure S1.** Key HMBC relationships for compound **1**

**Figure S2.** Key NOESY relationship for hydrolysis product of compound **1**

**Figure S3.** Key HMBC relationships for compound **2**

**Figure S4.** Key HMBC relationships for compound **3**

**Figure S5.** Key HMBC relationships for compound **4**

**Figure S6.** Key HMBC relationships for compound **5**

**Figure S7.** Key HMBC relationships for compound **6**

**Scheme S1.** Acid hydrolysis of compound **1**

**Table S1.** <sup>1</sup>H NMR and <sup>13</sup>C NMR Data of Hydrolysis Product of Compound **1** in

C<sub>5</sub>D<sub>5</sub>N

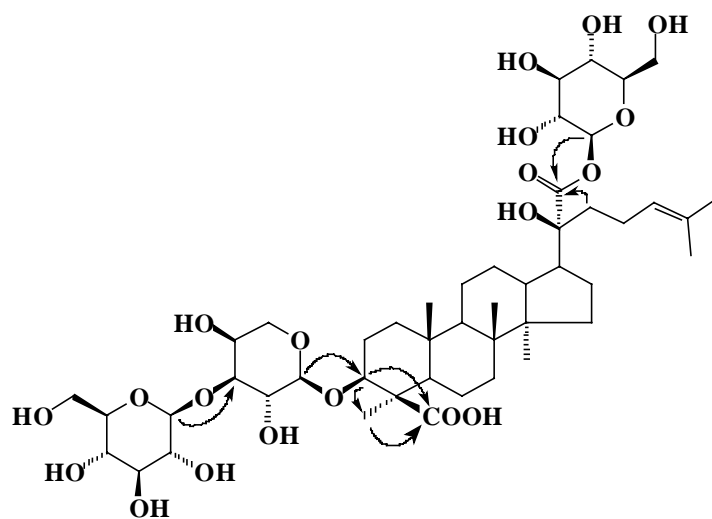

**Figure S1.** Key HMBC relationships for compound **1**

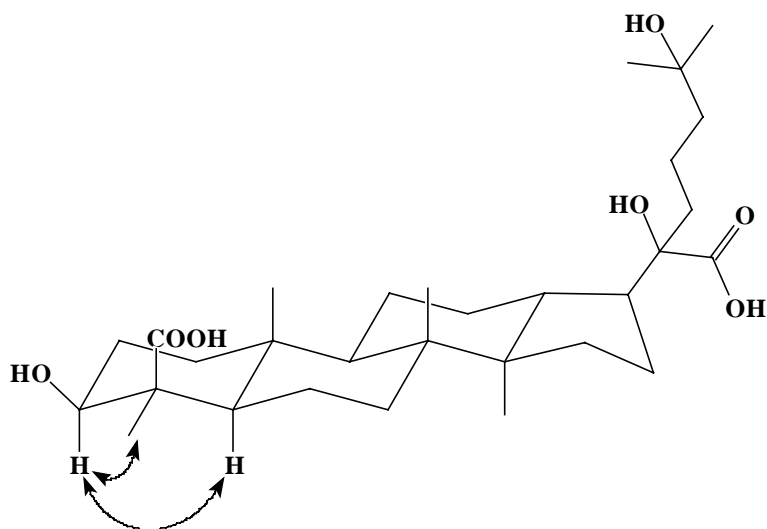

**Figure S2.** Key NOESY relationship for the hydrolysis product of compound **1**

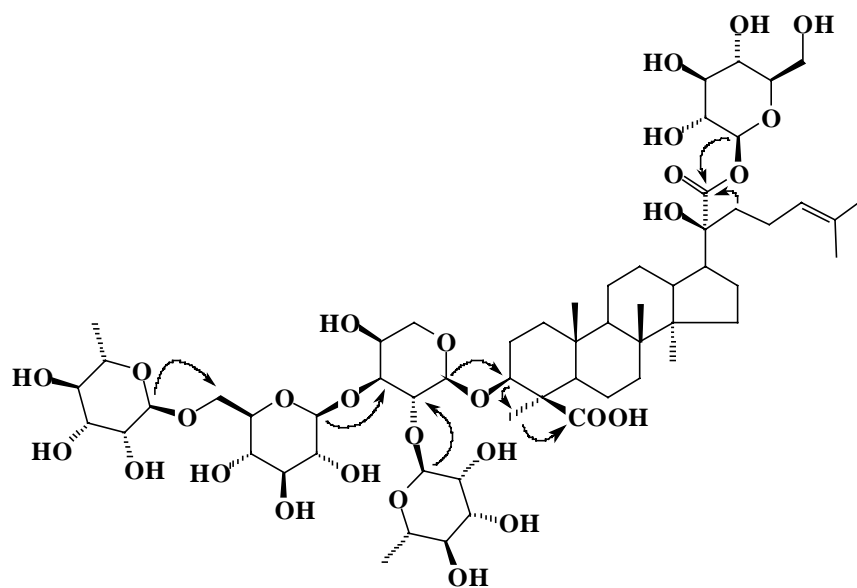

**Figure S3.** Key HMBC relationships for compound 2

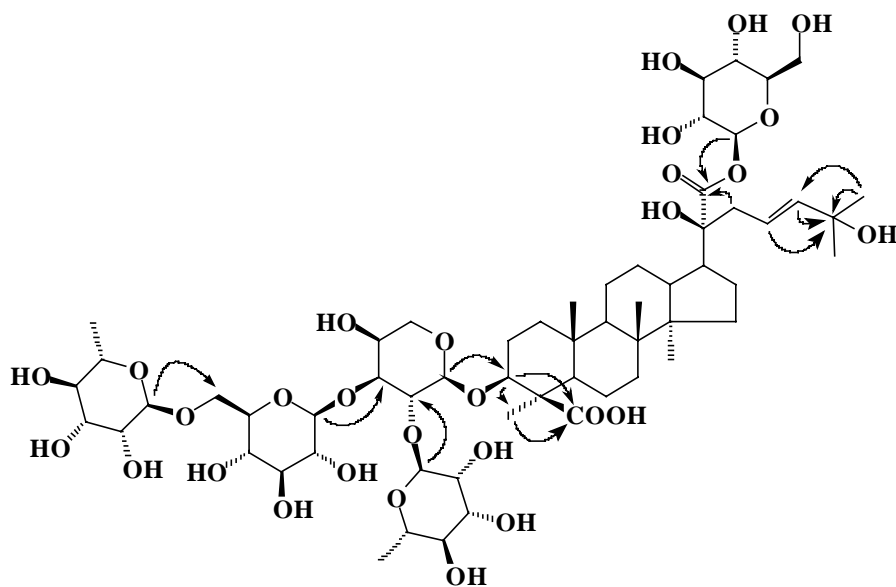

**Figure S4.** Key HMBC relationships for compound 3

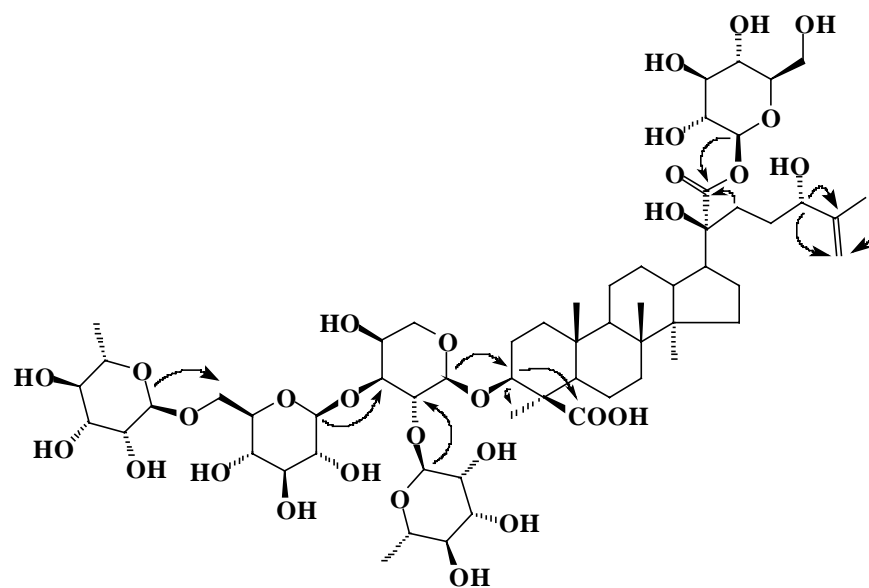

**Figure S5.** Key HMBC relationships for compound **4**

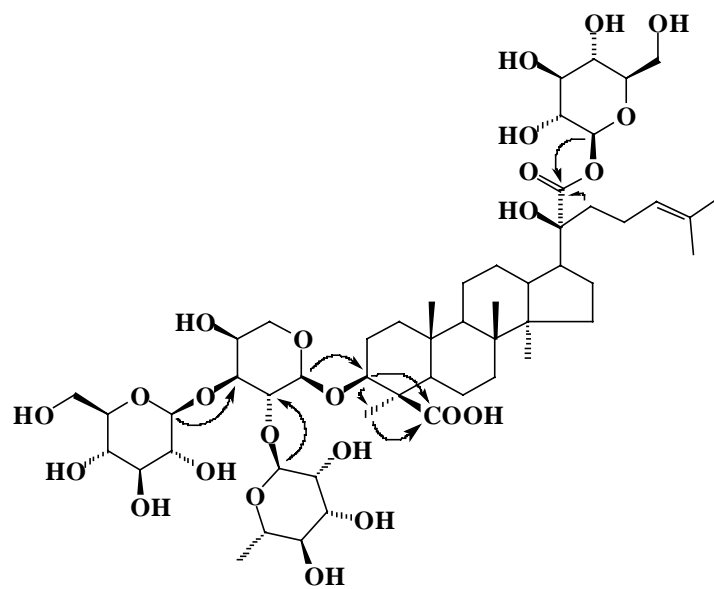

**Figure S6.** Key HMBC relationships for compound **5**

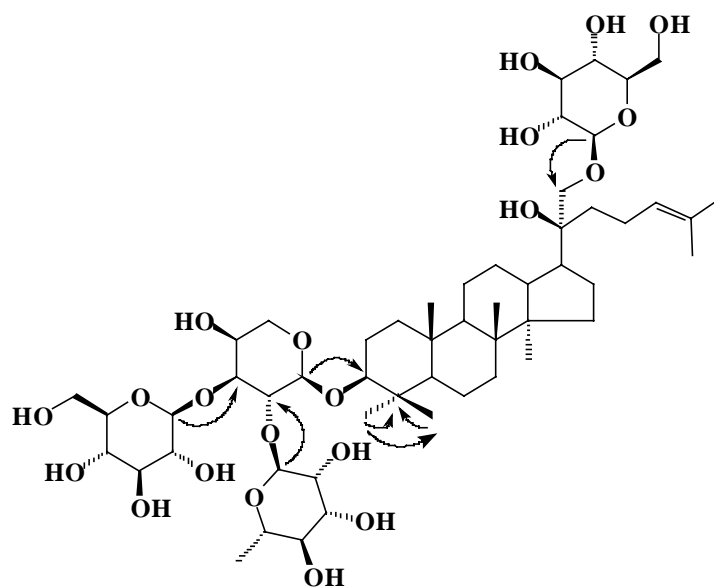

**Figure S7.** Key HMBC relationships for compound **6**

**Scheme S1.** Acid hydrolysis of compound **1**

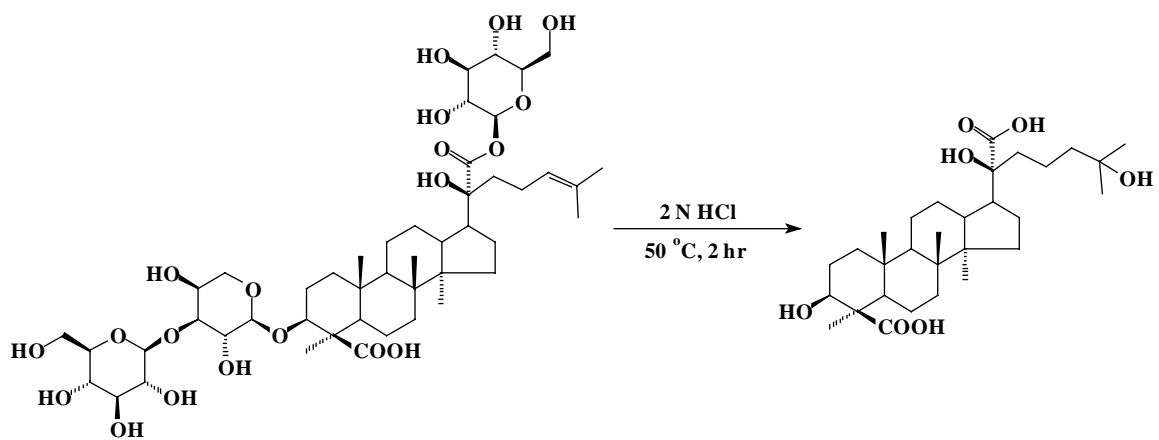

**Table S1.**  $^1\text{H}$  NMR and  $^{13}\text{C}$  NMR Data of Hydrolysis Product of Compound **1** in  $\text{C}_5\text{D}_5\text{N}$ 

| position | $\delta_{\text{H}}^{\text{a}}$ | $\delta_{\text{C}}^{\text{b}}$ |
|----------|--------------------------------|--------------------------------|
| 1        | 1.05 m, 1.75 m                 | 40.4                           |
| 2        | 2.00 m, 2.50 m                 | 29.6                           |
| 3        | 3.45 dd (10.9, 4.5)            | 78.5                           |
| 4        |                                | 49.7                           |
| 5        | 1.12 m                         | 57.4                           |
| 6        | 2.10 m, 2.35 m                 | 21.0                           |
| 7        | 1.45 m, 1.65 m                 | 36.2                           |
| 8        |                                | 40.9                           |
| 9        | 1.43 m                         | 50.7                           |
| 10       |                                | 38.2                           |
| 11       | 1.27 m, 1.55 m                 | 22.4                           |
| 12       | 2.20 m, 2.28 m                 | 24.8                           |
| 13       | 2.30 m                         | 41.6                           |
| 14       |                                | 50.7                           |
| 15       | 1.22 m, 1.78 m                 | 31.4                           |
| 16       | 1.50 m, 2.18 m                 | 26.4                           |
| 17       | 2.58 m                         | 49.2                           |
| 18       | 1.10 s                         | 16.0                           |
| 19       | 1.10 s                         | 14.8                           |
| 20       |                                | 78.5                           |
| 21       |                                | 180.5                          |
| 22       | 2.20 m                         | 40.9                           |
| 23       | 1.95 m, 2.32 m                 | 19.9                           |
| 24       | 1.85 m                         | 45.5                           |
| 25       |                                | 69.9                           |
| 26       | 1.42 s                         | 30.0                           |
| 27       | 1.42 s                         | 30.5                           |
| 28       | 1.78 s                         | 24.9                           |
| 29       |                                | 181.1                          |
| 30       | 1.10 s                         | 16.9                           |

<sup>a</sup> Measure in 500 MHz; referenced to  $\delta 7.58$  ( $\text{C}_5\text{D}_5\text{N}$ );  $J$  values (Hz) in parentheses.

<sup>b</sup> Measure in 125 MHz; referenced to  $\delta 135.9$  ( $\text{C}_5\text{D}_5\text{N}$ ).
